# Supplementary material for: Analysis of the Clinical Research Status of 121 Rare Diseases in China
Source: Research Square preprint supplement (doi:10.21203/rs.3.rs-1915891/v1), 2022-12-13
Supplement: Supplementary file 1 [file d2e7a41a91933ae14612c4fb.docx]

**Highlights**

- The People’s Republic of China pinpoints the issues of rare disease studies in the form of a catalogue involving 121 rare diseases
- Registers of rare disease clinical studies have shown vigorous growth in recent years
- Rare disease clinical registered records analysis reveals status and trends of those researches initiated in China and underlines points in terms of scientific and social governance.
